# Supplementary material
Source: publisher site journal article supplement (https://www.spandidos-publications.com/6665/downloadSupplementary)
Supplement: Supplementary file 1 [file downloadSupplementary]

Table SV. Results of Kyoto Encyclopedia of Genes and Genomes Pathway analysis.

| Enrichment FDR | nGenes     | Pathway genes | Pathway                                                        | URL                                                                                                                   |
|----------------|------------|---------------|----------------------------------------------------------------|-----------------------------------------------------------------------------------------------------------------------|
| 0.091386751    | 1 (SNRPG)  | 131           | Path: hsa03040 Spliceosome                                     | <a href="http://www.genome.jp/kegg-bin/show_pathway?hsa03040">http://www.genome.jp/kegg-bin/show_pathway?hsa03040</a> |
| 0.091386751    | 1 (PSMD13) | 46            | Path: hsa03050 Proteasome                                      | <a href="http://www.genome.jp/kegg-bin/show_pathway?hsa03050">http://www.genome.jp/kegg-bin/show_pathway?hsa03050</a> |
| 0.091386751    | 1 (EGLN1)  | 109           | Path: hsa04066 HIF-1 signaling pathway                         | <a href="http://www.genome.jp/kegg-bin/show_pathway?hsa04066">http://www.genome.jp/kegg-bin/show_pathway?hsa04066</a> |
| 0.091386751    | 1 (Cul3)   | 142           | Path: hsa04120 Ubiquitin mediated proteolysis                  | <a href="http://www.genome.jp/kegg-bin/show_pathway?hsa04120">http://www.genome.jp/kegg-bin/show_pathway?hsa04120</a> |
| 0.091386751    | 1 (Cul3)   | 56            | Path: hsa04340 Hedgehog signaling pathway                      | <a href="http://www.genome.jp/kegg-bin/show_pathway?hsa04340">http://www.genome.jp/kegg-bin/show_pathway?hsa04340</a> |
| 0.091386751    | 1 (PSMD13) | 142           | Path: hsa05017 Spinocerebellar ataxia                          | <a href="http://www.genome.jp/kegg-bin/show_pathway?hsa05017">http://www.genome.jp/kegg-bin/show_pathway?hsa05017</a> |
| 0.091386751    | 1 (EGLN1)  | 68            | Path: hsa05211 Renal cell carcinoma                            | <a href="http://www.genome.jp/kegg-bin/show_pathway?hsa05211">http://www.genome.jp/kegg-bin/show_pathway?hsa05211</a> |
| 0.112861579    | 1 (PSMD13) | 202           | Path: hsa05169 Epstein-Barr virus infection                    | <a href="http://www.genome.jp/kegg-bin/show_pathway?hsa05169">http://www.genome.jp/kegg-bin/show_pathway?hsa05169</a> |
| 0.120897808    | 1 (PSMD13) | 266           | Path: hsa05012 Parkinson disease                               | <a href="http://www.genome.jp/kegg-bin/show_pathway?hsa05012">http://www.genome.jp/kegg-bin/show_pathway?hsa05012</a> |
| 0.120897808    | 1 (PSMD13) | 273           | Path: hsa05020 Prion disease                                   | <a href="http://www.genome.jp/kegg-bin/show_pathway?hsa05020">http://www.genome.jp/kegg-bin/show_pathway?hsa05020</a> |
| 0.122662956    | 1 (PSMD13) | 306           | Path: hsa05016 Huntington disease                              | <a href="http://www.genome.jp/kegg-bin/show_pathway?hsa05016">http://www.genome.jp/kegg-bin/show_pathway?hsa05016</a> |
| 0.128929966    | 1 (PSMD13) | 384           | Path: hsa05010 Alzheimer disease                               | <a href="http://www.genome.jp/kegg-bin/show_pathway?hsa05010">http://www.genome.jp/kegg-bin/show_pathway?hsa05010</a> |
| 0.128929966    | 1 (PSMD13) | 364           | Path: hsa05014 Amyotrophic lateral sclerosis                   | <a href="http://www.genome.jp/kegg-bin/show_pathway?hsa05014">http://www.genome.jp/kegg-bin/show_pathway?hsa05014</a> |
| 0.146635891    | 1 (PSMD13) | 476           | Path: hsa05022 Pathways of neurodegeneration-multiple diseases | <a href="http://www.genome.jp/kegg-bin/show_pathway?hsa05022">http://www.genome.jp/kegg-bin/show_pathway?hsa05022</a> |
| 0.151319451    | 1 (EGLN1)  | 530           | Path: hsa05200 Pathways in cancer                              | <a href="http://www.genome.jp/kegg-bin/show_pathway?hsa05200">http://www.genome.jp/kegg-bin/show_pathway?hsa05200</a> |
